# Supplementary material for: Efficient conversion of ethanol to 1-butanol and C5–C9 alcohols over calcium carbide
Source: Royal Society of Chemistry journal article supplement (doi:10.1039/c9ra02568e), 2019-01-01
Supplement: c9ra02568e1.pdf [file c9ra02568e1.pdf]

## Supporting Information

### **Efficient conversion of ethanol to 1-butanol and C<sub>5</sub>-C<sub>9</sub> alcohols over calcium carbide**

Dong Wang, Zhenyu Liu and Qingya Liu\*

State Key Laboratory of Chemical Resource Engineering, Beijing University of Chemical Technology,  
Beijing, 100029, China.

\*Corresponding author: [qyliu@mail.buct.edu.cn](mailto:qyliu@mail.buct.edu.cn)

## EXPERIMENTAL

### (1) Quantitative calculation of gas products

After the indicated reaction time, the reactor was cooled to room temperature with ice water and the gage pressure was recorded as  $P_1$ . The total volume of gas product at the atmospheric pressure (termed  $V_g$ ) was estimated based on Eq. (1), where  $V$  is the void volume of the reactor at the reaction condition and  $P_0$  is the atmospheric pressure. The volume of each component in the injected gas (termed  $V_i$ ) was determined by its corresponding standard curve and the content of each component (termed  $C_i$ ) was calculated by Eq. (2), where the  $V_a$  is the volume of gas injected into the GC for analysis. The mole amount of each component in the gas product (termed  $M_i$ , mmol) was obtained by Eq. (3), where the  $V_g$  is the total volume of gas product.

$$V_g = \frac{P_1 \times V}{P_0} \quad (1)$$

$$C_i = \frac{V_i}{V_a} \times 100\% \quad (i = \text{C}_2\text{H}_2, \text{C}_2\text{H}_4, \text{H}_2, \text{CH}_4 \text{ and CO}) \quad (2)$$

$$M_i = \frac{C_i \times V_g}{22.4} \quad (3)$$

The average density of gas product ( $\rho_g$ ) can be obtained by Eq. (4), where  $\rho_i$  is the density of each gas product. The mass of gas product ( $m_g$ ) was obtained by Eq. (5).

$$\rho_g = \sum \rho_i \times C_i \quad (4)$$

$$m_g = \rho_g \times V_g \quad (5)$$

### (2) Calculation of ethanol conversion and products' yields

Ethanol conversion ( $X_{\text{ethanol}}$ ), yields of various alcohols ( $Y_{\text{alcohol}}$ ), carbon yields of gas product ( $Y_{\text{gas-C}}$ ) and solid product ( $Y_{\text{solid-C}}$ ), as well as the carbon balance (%C) were estimated by Eqs. (6)-(10), respectively.

$$X_{\text{ethanol}} = \left(1 - \frac{\text{the total carbon in ethanol in the liquid product}}{\text{the total carbon in ethanol fed into the reactor}}\right) \times 100\% \quad (6)$$

$$Y_{\text{alcohols}} = \frac{\text{the total carbon in alcohol products}}{\text{the total carbon in ethanol fed into the reactor}} \times 100\% \quad (7)$$

$$Y_{\text{gas}} = \frac{\text{the total carbon in gas products}}{\text{the total carbon fed into the reactor}} \times 100\% \quad (8)$$

$$Y_{\text{solid}} = \frac{\text{the total carbon in solid products}}{\text{the total carbon fed into the reactor}} \times 100\% \quad (9)$$

$$\%C = \frac{\text{the total carbon identified in the products}}{\text{the total carbon fed into the reactor}} \times 100\% \quad (10)$$

### (3) Carbon balance of CaC<sub>2</sub>

The alkynyl moiety in CaC<sub>2</sub> is converted to C<sub>2</sub>H<sub>2</sub> and EVE according to *Re.* (1) and (2). If CaC<sub>2</sub> is completely converted and C<sub>2</sub>H<sub>2</sub> and EVE don't consume, the total amount of C<sub>2</sub>H<sub>2</sub> and EVE should be the same as that of CaC<sub>2</sub> (23 mmol). If the total amount of C<sub>2</sub>H<sub>2</sub> and EVE is less than that of CaC<sub>2</sub>, consumption of C<sub>2</sub>H<sub>2</sub> or EVE such as EVE polycondensation should take place. The carbon balance of CaC<sub>2</sub> is shown in Table S3.

## RESULTS

**Table S1** Heterogeneous catalysts reported in literatures for coupling of ethanol to 1-butanol

| Catalyst                                              | Reactor    | Temp. (°C) | Ethanol conv. (%) | 1-butanol yield (%) | STY <sup>a</sup> (g <sub>pro</sub> kg <sub>cat</sub> <sup>-1</sup> h <sup>-1</sup> ) | Ref. |
|-------------------------------------------------------|------------|------------|-------------------|---------------------|--------------------------------------------------------------------------------------|------|
| Sr-HAP<br>(Sr/P=1.7)                                  | Continuous | 300        | 11.3              | 9.8                 | 160                                                                                  | 16   |
| HAP (Ca/P=1.64)                                       | Continuous | 400        | 57.4              | 25.7                | 671                                                                                  | 17   |
| HAP                                                   | Continuous | 440        | 30.0              | 15.0                | 257                                                                                  | 18   |
| HAP-CO <sub>3</sub>                                   | Continuous | 400        | 40.0              | 22.4                | 290                                                                                  | 19   |
| MgO                                                   | Continuous | 450        | 56.0              | 18.4                | 270                                                                                  | 20   |
| MgAl oxide<br>(Mg/Al=3)                               | Continuous | 350        | 32.0              | 13.0                | 400                                                                                  | 22   |
| MgAl oxide<br>(Mg/Al=3)                               | Continuous | 350        | 50.0              | 10.0                | 220                                                                                  | 23   |
| MgFe oxide                                            | Continuous | 350        | 50.0              | 9.0                 | 220                                                                                  | 24   |
| Cu/CeO <sub>2</sub>                                   | Continuous | 330        | 67.0              | 30.0                | 474                                                                                  | 28   |
| In-CuMgAl oxide                                       | Batch      | 260        | 27.0              | 16.2                | 617                                                                                  | 25   |
| Cu-Mg-Al oxide                                        | Batch      | 260        | 9.5               | 7.6                 | 203                                                                                  | 26   |
| Ni/γ-Al <sub>2</sub> O <sub>3</sub>                   | Batch      | 230        | 40.0              | 20.0                | 187                                                                                  | 29   |
| Cu <sub>10</sub> Ni <sub>10</sub> -porous metal oxide | Batch      | 320        | 56.0              | 22.0                | 705                                                                                  | 27   |

<sup>a</sup> Space-time yield of 1-butanol.

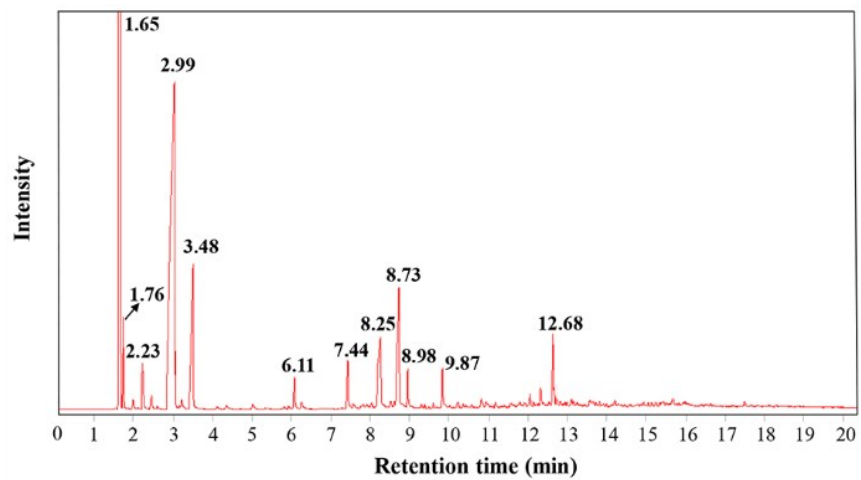

**Fig. S1** Total ion chromatogram of the liquid product of ethanol reaction at 190 °C for 8 h over  $\text{CaC}_2$ .

**Table S2** The corresponding substance at each retention time in Fig. 1 identified by MS

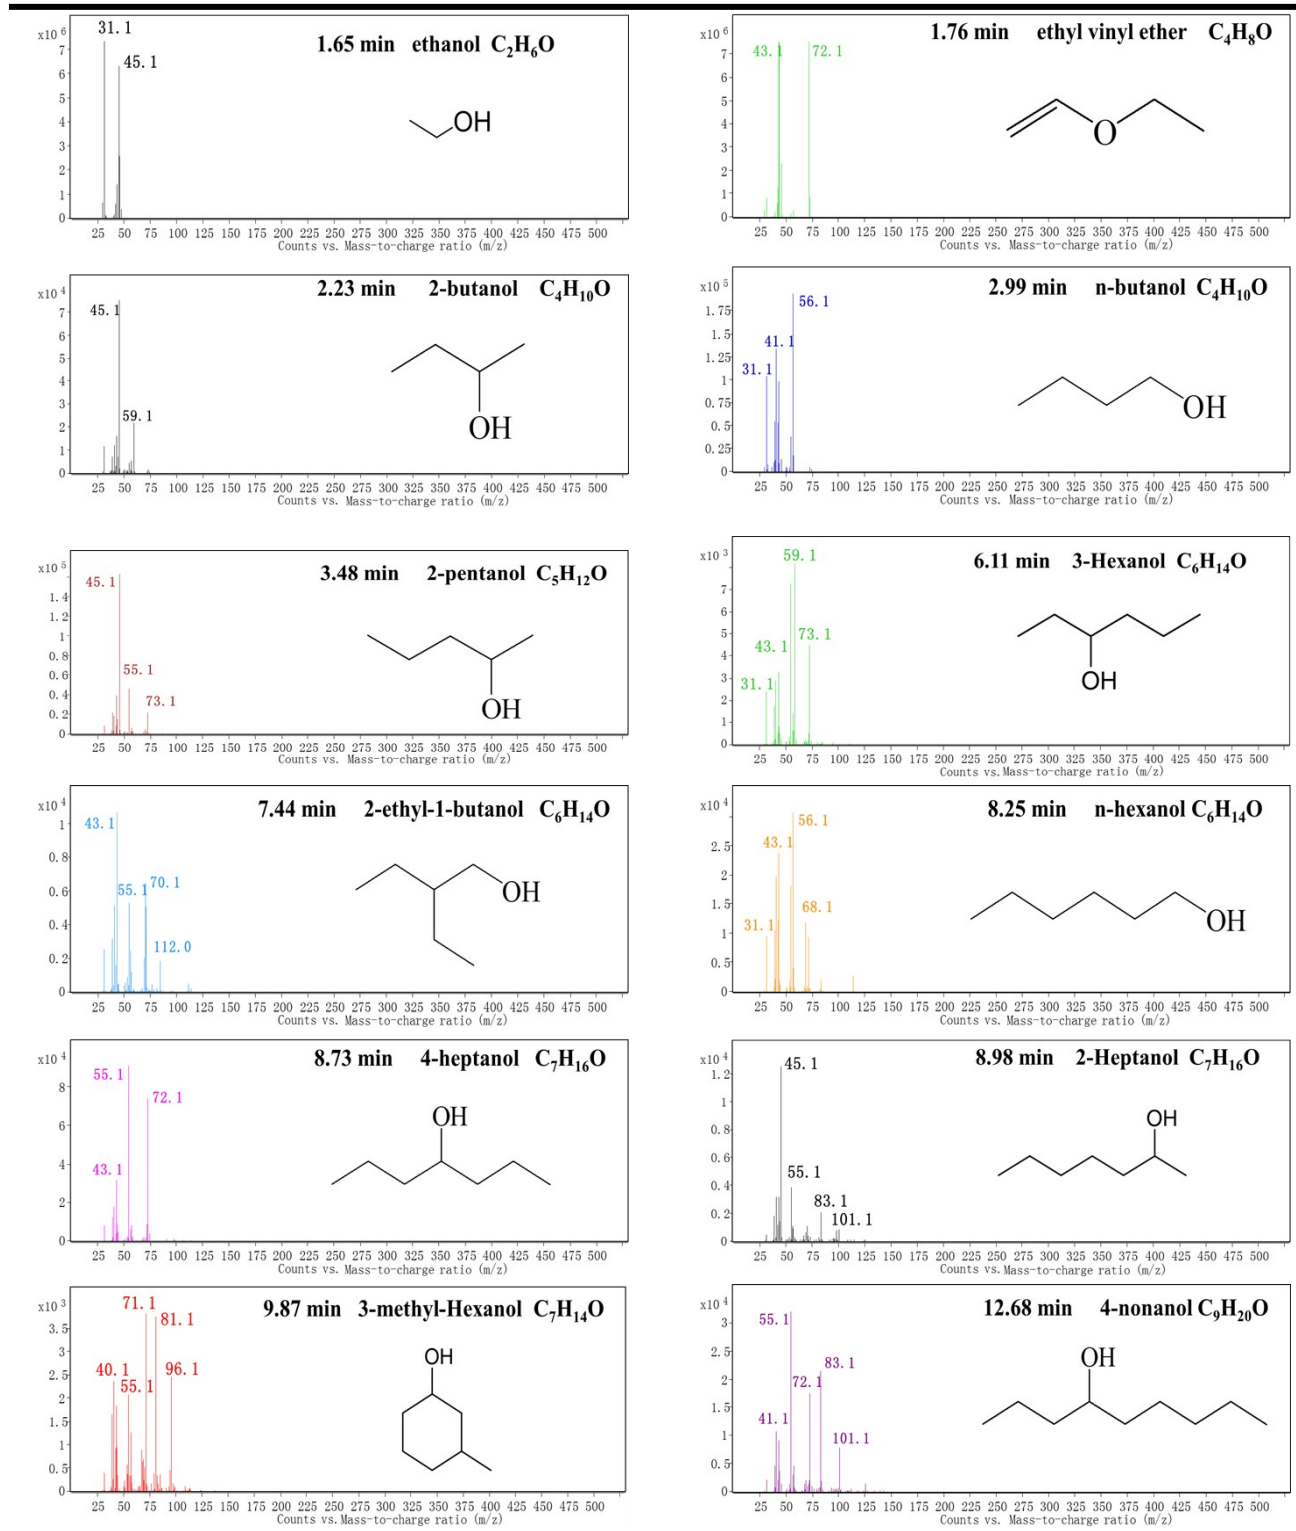

**Table S3** The yield of various liquid products determined by GC

| Entry | Calcium reactant                                           | Temp. (°C) | Time (h) | Carbon balance (%) | Yield (%)  |                      |                       |           |
|-------|------------------------------------------------------------|------------|----------|--------------------|------------|----------------------|-----------------------|-----------|
|       |                                                            |            |          |                    | 2-pentanol | hexanol <sup>a</sup> | heptanol <sup>b</sup> | 4-nonanol |
| 1     | 23 mmol CaC <sub>2</sub>                                   | 190        | 6        | 95.7               | 2.2        | 2.2                  | 0.6                   | 0.9       |
| 2     | 23 mmol CaC <sub>2</sub>                                   | 235        | 6        | 95.2               | 2.9        | 4.7                  | 1.6                   | 1.3       |
| 3     | 23 mmol CaC <sub>2</sub>                                   | 255        | 6        | 96.1               | 3.5        | 5.4                  | 2.4                   | 2.0       |
| 4     | 23 mmol CaC <sub>2</sub>                                   | 275        | 6        | 95.1               | 3.7        | 5.8                  | 3.8                   | 2.9       |
| 5     | 23 mmol CaC <sub>2</sub>                                   | 300        | 6        | 95.0               | 4.5        | 7.4                  | 5.4                   | 2.0       |
| 6     | 23 mmol CaC <sub>2</sub>                                   | 315        | 6        | 92.8               | 5.5        | 8.8                  | 5.7                   | 1.1       |
| 7     | 23 mmol CaC <sub>2</sub>                                   | 275        | 1        | 96.6               | 2.7        | 3.1                  | 1.1                   | 1.3       |
| 8     | 23 mmol CaC <sub>2</sub>                                   | 275        | 3        | 96.5               | 3.3        | 4.6                  | 2.4                   | 1.9       |
| 9     | 23 mmol CaC <sub>2</sub>                                   | 275        | 8        | 94.9               | 5.1        | 7.1                  | 4.6                   | 3.3       |
| 10    | 23 mmol CaC <sub>2</sub>                                   | 275        | 12       | 92.8               | 4.8        | 7.5                  | 5.0                   | 3.4       |
| 11    | 23 mmol CaC <sub>2</sub>                                   | 275        | 15       | 92.3               | 4.7        | 8.3                  | 5.4                   | 3.2       |
| 12    | 12 mmol CaC <sub>2</sub>                                   | 275        | 6        | 92.4               | 2.4        | 3.7                  | 2.0                   | 2.2       |
| 13    | 34 mmol CaC <sub>2</sub>                                   | 275        | 6        | 96.2               | 4.7        | 8.3                  | 6.7                   | 3.8       |
| 14    | 23 mmol Ca(OH) <sub>2</sub>                                | 275        | 8        | 98.5               | 4.8        | 0.0                  | 0.0                   | 0.0       |
| 15    | 23 mmol Ca(OCH <sub>2</sub> CH <sub>3</sub> ) <sub>2</sub> | 275        | 8        | 93.2               | 3.4        | 2.9                  | 0.0                   | 0.0       |

<sup>a</sup> Hexanol includes 1-hexanol, 3-hexanol and 3-ethylcyclohexanol;

<sup>b</sup> Heptanol includes 2-heptanol and 4-heptanol.

**Table S4** The carbon balance of CaC<sub>2</sub> during ethanol conversion at 275 °C <sup>a</sup>

| Entry | Time (h) | Amount (mmol) |                               |                         | EVE in solid residual due to its polymerization |              |
|-------|----------|---------------|-------------------------------|-------------------------|-------------------------------------------------|--------------|
|       |          | EVE           | C <sub>2</sub> H <sub>2</sub> | difference <sup>b</sup> | Theoretical                                     | Experimental |
| 1     | 6        | 1.2           | 7.4                           | 14.4                    | 28.8                                            | 25.9         |
| 2     | 8        | 1.3           | 6.9                           | 14.8                    | 29.6                                            | 24.5         |
| 3     | 12       | 1.4           | 6.9                           | 14.7                    | 29.4                                            | 23.5         |

<sup>a</sup> The amount of ethanol and CaC<sub>2</sub> are 217 and 23 mmol, respectively.

<sup>b</sup> The difference is obtained by subtracting the amounts of EVE and C<sub>2</sub>H<sub>2</sub> from the total amount of CaC<sub>2</sub>. These EVE were polymerized.



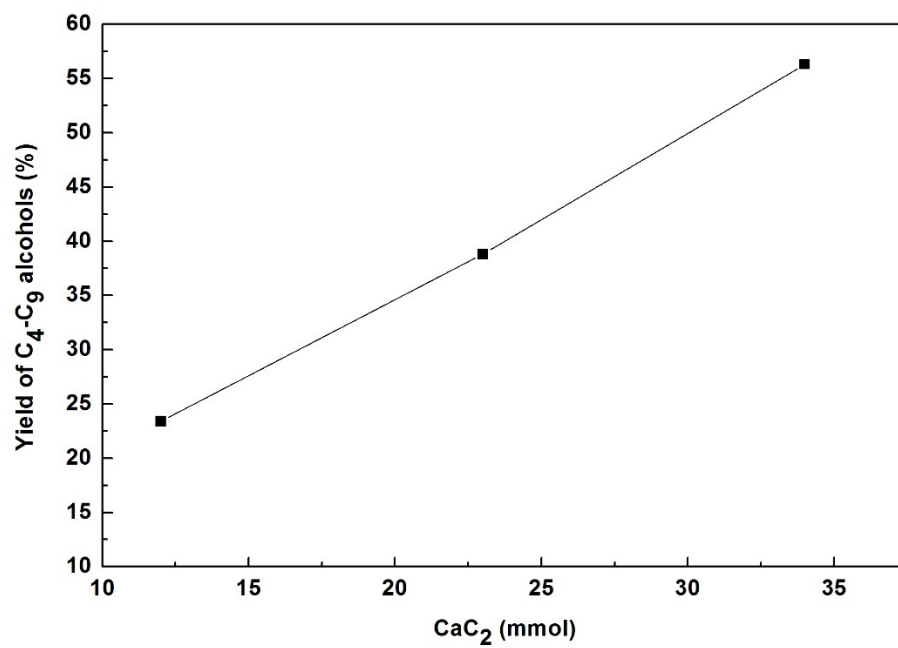

**Fig. S2** The yield of C<sub>4</sub>-C<sub>9</sub> alcohols at 275 °C for 6 h vs. the CaC<sub>2</sub> loading.
